# Supplementary material
Source: publisher figshare collection journal article supplement (https://springernature.figshare.com/ndownloader/files/18186539)
Supplement: Supplementary file [file 18186539]

**Personal determinants (carers)**

- Carers do not want to know some things, e.g. if their partner had epilepsy\*
- Carers are not always in the right frame of mind to take on some information whilst the stroke survivor is in hospital\*
- Carers are too busy to read written information whilst the stroke survivor is in hospital\*
- Carers are too proud to ask for information\*
- **Carers do not want to bother professionals for information and support \***
- **Carers assume that information and support will be provided and therefore take a passive approach to gaining this\***
- **Carers lack knowledge and skills for being prepared following the transition from hospital to home/ providing practical care**
- ***Carers lack knowledge about who and what to ask regarding support and information\****
- **Carers are uncertain about the type of support required and their support needs**
- ***Carers are reluctant to ask family and friends for support due to feeling bothersome, not wanting to disturb them***
- Carers might see it as a weakness to ask for help from professionals, family or friends\*
- Carers lack confidence for attending stroke groups on their own initially\*
- Carers perceive that going to a group means that they are a failure\*
- *Initial anxieties, fears and lack of confidence for coping*
- *Uncertainties about caring abilities, extent of stroke survivors' recovery, managing changes in stroke survivor, life at home and impacts of stroke*
- *Feeling isolated, abandoned, shocked, distraught, stressed, scared, low, depressed*
- Carers have poor or a lack of coping strategies (Stroke, Cancer, Dementia, FTLD- type of dementia) \*
- **Carers lack realisation about the changes to their lives, relationships and the extent of the stroke survivors' impairments\***
- **Carers lack realisation about how hard things could be\***

**Personal determinants (others e.g. professionals, services, friends)**

- Health professionals are uncertain at stage during the stroke survivors' stay in hospital, therefore providing expectations is difficult\*
- Health professionals are too busy to give carers advice in hospital \*
- Professionals expect carers to cope if they have a medical background\*
- Professionals focus on the physical aspects of stroke, emotion comes second\*
- **Professionals focus on the stroke survivor rather than the longer term implications for the carer- wards are often therapy led\***
- Professionals may lack the skills to provide support and information to carers if they have been trained medically (too much use of medical language) \*
- Health professionals find it difficult to provide reassurance knowing there are poor facilities for carers\*
- **Health professionals do not have time to prepare carers, poor timing of visits, limited staff, and short length of hospital stay.**
- *Professionals lack time to involve carers in the stroke survivors' discharge*
- **Health professionals do not see it as their role to seek out carers to provide support once they return home**
- **Professionals lack time to follow up carers when they return home/ provide support in the community\***
- Services do not always take a family approach to providing care\*
- Services have difficulties keeping staff e.g. volunteer to provide support\*
- Services have difficulties getting information to carers quickly\*
- Services face financial and resource constraints\*
- Friends do not know how to handle the situation and often end up doing nothing\*
- *Family and friends feel uneasy about changes to the stroke survivor*
- ***Friends and family struggle to understand the situation***

**Behavioural factors**

- **Avoiding approaching health professionals for support**
- **Avoiding being active in seeking information (passive approach)**
- Carers do not always make use of information during the stroke survivors' time in hospital \*
- Carers do not seek information and support from professionals during the stroke survivors time in hospital \*
- ***Avoiding asking for support from family and friends\****
- Carers do not attend stroke groups\*
- *Carers provide care without preparation (emotional and practical)*
- Carers do not prepare emotionally for the changes to life and relationships etc.\*

**Environmental factors**

- Professionals in hospital do not inform the carers that the stroke survivor may change after their stroke\*
- **Poor communication from professionals (e.g. delivery of training, supporting the stroke survivor physically).**
- **Professionals fail to adequately assess whether carers understand the stroke survivors' needs**
- **Professionals fail to adequately teach carers to support the stroke survivor with their rehabilitation**
- ***Professionals do not inform carers about expectations for life at home, available facilities, access to support, cause of stroke and extent of recovery\****
- ***Professionals in hospital provide carers with too much information\****
- ***Professionals do not provide carers with enough support that is carers specific when the stroke survivor is in hospital (emotional or practical)\****
- *Professionals do not provide carers with reassurance about their abilities to care\**
- **Professionals do not always include carers in the discharge process\***
- **Professionals do not always provide appropriately timed information and support for carers/experience lack of opportunities to provide information**
- **Professionals do not provide carers with enough information when they return home, e.g. benefits, the stroke, groups or services\***
- ***Professionals do not provide carers with enough support about how they are getting on once they return home\* (influences coping with changed relationships, managing practically).***
- GPs do not provide consistent support once the stroke survivor returns home\*
- **Inadequate assessments of carer needs for supporting survivor as part of service provision**
- Services fail to provide adequate home care support once the stroke survivor returns home (Stroke)
- Services failing to provide continuity of rehabilitation in the community and at home (Stroke)
- Services fail to provide psychological support once the stroke survivor leaves hospital- coping general and specific aspects e.g. relationship
- **Services failing to provide appropriate/ accessible resources for information once the stroke survivor returns home\***
- **Services failing to provide appropriately formatted and timely information**
- **Services fail to provide available and accessible support in the community**
- ***Friends and family do not provide emotional or practical support (Stroke, Cancer)\****

**Health problem (burden)**

**Being/ feeling unprepared before and during the transition from hospital to home**

**Patient factors**

- Changes in behaviours of person with condition – (Dementia, FTLD, MCI, Stroke)- crying, laughing uncontrollably, loss of inhibitions\*
- Stroke survivors that lack empathy towards carer\*
- Severity of illness (Dementia, MCI, Stroke\*)
- Loss of speech\*
- *Level of stroke survivor impairment/ extent of improvements over time (Stroke)*

**Carer factors**

- Young age (Cancer, Dementia, Stroke\*), older age (Dementia)
- Gender- mixed findings (Dementia, Cancer, Stroke\*)
- Low income (Cancer, Stroke\*)
- Poor psychological health e.g. depression (Parkinson's Disease, Dementia, Stroke\*)

**Other factors**

- *Shock, distress when the stroke initially happened\**
- Not perceiving themselves as a carer initially and even for continued time following return home\*
- *Disruption to their imagined future and relationships\**
- Uncertainty around things getting better\*
- **Uncertainty around some practical aspects\***
- *Difficulties with emotional impacts attached to caring- low and depressed\**
- *Entering a role with little choice (obligation to care)*
